# Supplementary material
Source: Elsevier journal article supplement (https://www.sciencedirect.com/science/article/pii/S0212656716302116)
Supplement: mmc1 [file S0212656716302116:mmc1.doc]

Tabla 1. Valoración de efecto techo en ítems de Conocimientos [tabla completa]

Nota: las casillas sombreadas corresponden a los ítems eliminados debido a que la valoración del efecto techo superaban el 80%

Tabla 2. Valoración de efecto techo en ítems de Actitudes [tabla completa]

Tabla 3. Evaluación estabilidad de ítem (test-retest) [tabla completa]
